# Supplementary material
Source: MDPI journal article supplement (https://www.mdpi.com/2225-1154/8/4/57)
Supplement: s1 [file s1]

**Table 1:** The MCD12C1 International Geosphere-Biosphere Programme (IGBP) legend and class descriptions.

| Value | Name                                | Description                                                                                             |
|-------|-------------------------------------|---------------------------------------------------------------------------------------------------------|
| 0     | Water Bodies                        | At least 60% of area is covered by permanent water bodies.                                              |
| 1     | Evergreen Needleleaf Forests        | Dominated by evergreen conifer trees (canopy >2m).<br>Tree cover > 60%.                                 |
| 2     | Evergreen Broadleaf Forests         | Dominated by evergreen broadleaf and palmate trees (canopy > 2m). Tree cover > 60%.                     |
| 3     | Deciduous Needleleaf Forests        | Dominated by deciduous needleleaf (larch) trees (canopy >2m).<br>Tree cover > 60%.                      |
| 4     | Deciduous Broadleaf Forests         | Dominated by deciduous broadleaf trees (canopy >2m).<br>Tree cover > 60%.                               |
| 5     | Mixed Forests                       | Dominated by neither deciduous nor evergreen (40–60% of each) tree type (canopy >2m). Tree cover > 60%. |
| 6     | Closed Shrublands                   | Dominated by woody perennials (1-2m height) > 60% cover.                                                |
| 7     | Open Shrublands                     | Dominated by woody perennials (1-2m height) 10–60% cover.                                               |
| 8     | Woody Savannas                      | Tree cover 30-60% (canopy > 2m).                                                                        |
| 9     | Savannas                            | Tree cover 10-30% (canopy > 2m).                                                                        |
| 10    | Grasslands                          | Dominated by herbaceous annuals ( < 2m).                                                                |
| 11    | Permanent Wetlands                  | Permanently inundated lands with 30-60% water cover and > 10% vegetated cover.                          |
| 12    | Croplands                           | At least 60% of area is cultivated cropland.                                                            |
| 13    | Urban and Built-up Lands            | At least 30% impervious surface area including building materials, asphalt, and vehicles.               |
| 14    | Cropland/Natural Vegetation Mosaics | Mosaics of small-scale cultivation 40-60% with natural tree, shrub, or herbaceous vegetation.           |
| 15    | Permanent Snow and Ice              | At least 60% of area is covered by snow and ice for at least 10 months of the year.                     |
| 16    | Barren                              | At least 60% of area is non-vegetated barren (sand, rock, soil) areas with less than 10% vegetation.    |
| 255   | Unclassified                        | Has not received a map label because of missing inputs.                                                 |
